# Supplementary material
Source: publisher figshare collection journal article supplement (https://frontiersin.figshare.com/ndownloader/files/11184473)
Supplement: Supplementary file [file 11184473]

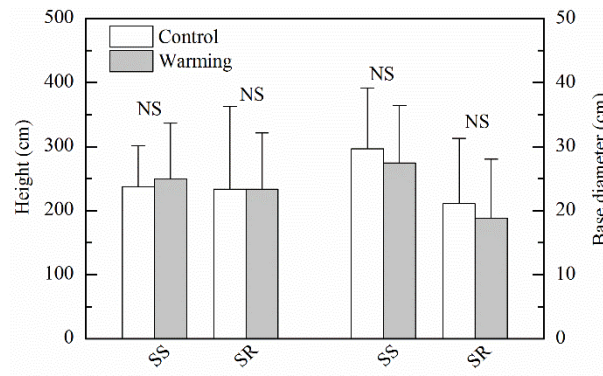

**Fig. S1** Height and Base diameter for the two study species grown in both control and warming environments. Values are mean  $\pm$ SD. NS indicates non-significant difference at  $P < 0.05$  (nested ANOVA). *SS* and *SR* represent *Schima superba* and *Syzygium rehderianum*, respectively.
